# Supplementary material
Source: PubMed Central journal article supplement (PMC5499517)
Supplement: NIHMS872787-supplement-Supplement.pdf [file NIHMS872787-supplement-Supplement.pdf]

**Table S1.** Anti-D typing results for the 3 novel DAU samples

| Patient     |          | Reaction strength (0 to 4+)     |       |         |                          |                                 |                   |                       |                                               |
|-------------|----------|---------------------------------|-------|---------|--------------------------|---------------------------------|-------------------|-----------------------|-----------------------------------------------|
|             |          | Gel matrix test (anti-D clones) |       |         |                          |                                 | Tube test         |                       |                                               |
| DAU variant | Location | D7B8*                           | MAD2* | MS-201† | LDM1,<br>RUM-1<br>TH28 ‡ | Microtiter test §<br>MS26, TH28 | Immediate<br>spin | Antiglobulin<br>phase | Incubation<br>15 min at room<br>temperature ¶ |
| DAU-5.1     | Linz     | 4+                              | 1+    | n.t.    | n.t.                     | n.t.                            | n.t.              | n.t.                  | n.t.                                          |
| DAU-11      | Salzburg | n.t.                            | n.t.  | n.t.    | 4+                       | (+)                             | n.t.              | n.t.                  | 1+                                            |
| DAU-11      | NIH      | n.t.                            | n.t.  | 3+      | n.t.                     | n.t.                            | 0                 | 3+                    | n.t.                                          |

\* ORTHO Clinical Diagnostics, BioVue System ABO-Rh Grouping Cassette: D7B8 and MAD2 (both IgM)

† ORTHO Clinical Diagnostics, ID-Micro Typing System Gel Test Cards: MS-201 (IgM)

‡ Bio-Rad, ID-Card: LDM1, RUM-1 and TH28 (all IgM); oligoclonal anti-D

§ Immucor, ImmuClone Anti-D duo Galileo IgM + IgG: TH28 (IgM) and MS26 (IgG); oligoclonal anti-D

|| Bio-Rad, Anti-D (RH1) Blend: BS232 (IgM), BS221 (IgG) and H41 11B7 (IgG); oligoclonal anti-D

¶ Bio-Rad, Anti-CDE (RH2,1,3): P3x61 (IgM) as the only anti-D in the oligoclonal antiserum

n.t. – not tested

**Table S2.** DAU variants and D antigen expression

| D variant       | Samples tested         |            |           | D antigen density | Anti-D clone (titer) |             |
|-----------------|------------------------|------------|-----------|-------------------|----------------------|-------------|
|                 | Molecular substitution |            | Phenotype |                   | HM16 (IgG)           | BS226 (IgM) |
|                 | Nucleotide             | Amino acid |           |                   |                      |             |
| Weak D type 25  | 341G>A                 | R114Q      | CcDee     | 604               | 256                  | 1           |
| Weak D type 3   | 8C>G                   | S3C        | CcDee     | 1117              | 1024                 | 1024        |
| DAU-11          | 254C>T                 | A85V       | ccDee     | 2483              | 2048                 | 256         |
|                 | 835G>A                 | V279M      |           |                   |                      |             |
| DVII            | 1136C>T                | T379M      | CCDee     | 2528              | 1024                 | 256         |
|                 | 329T>C                 | L110P      |           |                   |                      |             |
| DAU-5.1         | 667T>G                 | F223V      | ccDee     | 6236              | n.t.                 | n.t.        |
|                 | 697G>C                 | E233Q      |           |                   |                      |             |
|                 | 1122C>T                | I374I      |           |                   |                      |             |
| DVII            | 1136C>T                | T379M      | CcDee     | 7936              | 4096                 | 256         |
|                 | 329T>C                 | L110P      |           |                   |                      |             |
| DAU-5           | 667T>G                 | F223V      | ccDee     | 9849              | 1024                 | 512         |
|                 | 697G>C                 | E233Q      |           |                   |                      |             |
| DAU-5           | 1136C>T                | T379M      | ccDee     | 10,131            | 2048                 | 512         |
|                 | 667T>G                 | F223V      |           |                   |                      |             |
| DAU-5           | 697G>C                 | E233Q      | ccDee     | 10,131            | 2048                 | 512         |
| DAU-5           | 1136C>T                | T379M      | ccDee     | 10,131            | 2048                 | 512         |
| Controls (n=3)* | No mutation            |            | ccDee     | 22,105            | 4096                 | 2048        |

\* 3 different ccDee samples showed  $22,105 \pm 2210$  D antigens per RBC (mean  $\pm$  SD).  
n.t. – not tested (sample not available)

**Table S3.** Serologic reactivity with panels of anti-D

| Monoclonal anti-D |                   |     | Reaction strength (0 to 4+)* |                    |                           |                           |
|-------------------|-------------------|-----|------------------------------|--------------------|---------------------------|---------------------------|
| Clone             | Isotype           | epD | DAU-11  <br>ccDee            | DAU-5.0  <br>ccDee | Positive control<br>ccDee | Negative control<br>ccdee |
| LHM76/58†         | IgG <sub>1λ</sub> | ND  | 4+                           | 2+                 | 4+                        | 0                         |
| LHM76/59†         | IgG <sub>1</sub>  | ND  | 4+                           | 4+                 | 4+                        | 0                         |
| LHM174/102‡       | IgG <sub>3κ</sub> | 1.2 | 3+                           | 1+                 | 4+                        | 0                         |
| LHM50/2B†         | IgG <sub>1λ</sub> | 6.3 | 4+                           | 4+                 | 4+                        | 0                         |
| LHM169/81†        | IgG <sub>3κ</sub> | 1.1 | 4+                           | 2+                 | 4+                        | 0                         |
| ESD1†             | IgG <sub>1κ</sub> | ND  | 4+                           | 4+                 | 4+                        | 0                         |
| LHM76/55†         | IgG <sub>1κ</sub> | 3.1 | 3+                           | 4+                 | 4+                        | 0                         |
| LHM77/64†         | IgG <sub>1κ</sub> | 9.1 | 4+                           | 4+                 | 4+                        | 0                         |
| LHM70/45†         | IgG <sub>1λ</sub> | 1.2 | 1+                           | 0                  | 4+                        | 0                         |
| LHM59/19†         | IgG <sub>3κ</sub> | 8.1 | 3+                           | 4+                 | 4+                        | 0                         |
| LHM169/80†        | IgG <sub>3λ</sub> | 6.3 | 4+                           | 4+                 | 4+                        | 0                         |
| LHM57/17†         | IgG <sub>1λ</sub> | 6.3 | 3+                           | 4+                 | 4+                        | 0                         |
| HM10‡             | IgM               | 6.6 | 4+                           | 4+                 | 4+                        | 0                         |
| HM16‡             | IgG               | 6.4 | 4+                           | 4+                 | 4+                        | 0                         |
| P3X61‡            | IgM               | 6.1 | 4+                           | 4+                 | 4+                        | 0                         |
| P3X35‡            | IgG               | 5.4 | 4+                           | 1+                 | 4+                        | 0                         |
| P3X212 11 F1‡     | IgM               | 8.2 | 2+                           | 2+                 | 4+                        | 0                         |
| P3X212 23 B10‡    | IgM               | 9.1 | 2+                           | 4+                 | 4+                        | 0                         |
| P3X241‡           | IgG               | 5.4 | 4+                           | 2+                 | 4+                        | 0                         |
| P3X249‡           | IgG               | 2.1 | 4+                           | 4+                 | 4+                        | 0                         |
| P3X290‡           | IgG               | 3.1 | 4+                           | 4+                 | 4+                        | 0                         |
| BS221§            | IgG               | 6.3 | 3+                           | 3+                 | 3+                        | 0                         |
| H41§              | IgG               | 3.1 | 3+                           | 4+                 | 4+                        | 0                         |
| BS226§            | IgM               | 6.4 | 4+                           | 4+                 | 4+                        | 0                         |
| BS232§            | IgM               | 6.4 | 3+                           | 4+                 | 4+                        | 0                         |

\* Gel matrix tests with antiglobulin; Anti-Human Globulin Anti-IgG (Rabbit) MTS Anti-IgG Card, Ortho

† ALBAclone Advanced Partial RhD typing kit, Alba Bioscience

‡ D-Screen, Diagast

§ Seraclone Anti-D (RH1) panel, Bio-Rad

|| Testing for DAU-5.1 and DAU-11 (Salzburg sample) was not done because of lack of RBCs.

¶ DAU-3 sample for comparison with DAU-11 was not done because of lack of RBCs.

**Table S4.** The 18 known *DAU* alleles

| Allele         | Nucleotide positions in <i>RHD</i> exons 1 to 10 (rs numbers)* |           |          |          |           |           |       |       |           |          |         |           |         |       |           |           |       |          |      |      | GenBank number |
|----------------|----------------------------------------------------------------|-----------|----------|----------|-----------|-----------|-------|-------|-----------|----------|---------|-----------|---------|-------|-----------|-----------|-------|----------|------|------|----------------|
|                | 1                                                              | 2         |          |          |           |           | 3     | 4     |           |          | 5       |           |         |       | 6         | 7         | 8     |          | 9    | 10   |                |
|                | 48                                                             | 150       | 201      | 203      | 209       | 254       | 340   | 535   | 542       | 579      | 667     | 689       | 697     | 739   | 835       | 998       | 1122  | 1136     | n.a. | n.a. |                |
| Reference*     | G                                                              | T         | G        | G        | G         | C         | C     | T     | T         | G        | T       | G         | G       | G     | G         | G         | C     | C        | -    | -    | NM_016124.4    |
| <i>DAU-0</i>   | -                                                              | -         | -        | -        | -         | -         | -     | -     | -         | -        | -       | -         | -       | -     | -         | -         | -     | T        | -    | -    | n.a.           |
| <i>DAU-0.1</i> | -                                                              | -         | -        | -        | -         | -         | -     | -     | -         | A        | -       | -         | -       | -     | -         | -         | -     | -        | -    | -    | n.a.           |
| <i>DAU-0.2</i> | -                                                              | C         | -        | -        | -         | -         | -     | -     | -         | -        | -       | -         | -       | -     | -         | -         | -     | -        | -    | -    | n.a.           |
| <i>DAU-1</i>   | -                                                              | -         | -        | -        | -         | -         | -     | -     | -         | -        | -       | T         | -       | -     | -         | -         | -     | -        | -    | -    | n.a.           |
| <i>DAU-2</i>   | -                                                              | -         | -        | -        | A         | -         | -     | -     | -         | -        | -       | -         | -       | -     | -         | A         | -     | -        | -    | -    | n.a.           |
| <i>DAU-3</i>   | -                                                              | -         | -        | -        | -         | -         | -     | -     | -         | -        | -       | -         | -       | -     | A         | -         | -     | -        | -    | -    | n.a.           |
| <i>DAU-4</i>   | -                                                              | -         | -        | -        | -         | -         | -     | -     | -         | -        | -       | -         | A       | -     | -         | -         | -     | -        | -    | -    | n.a.           |
| <i>DAU-5</i>   | -                                                              | -         | -        | -        | -         | -         | -     | -     | -         | -        | G       | -         | C       | -     | -         | -         | -     | -        | -    | -    | n.a.           |
| <i>DAU-5.1</i> | -                                                              | -         | -        | -        | -         | -         | -     | -     | -         | -        | G       | -         | C       | -     | -         | -         | T     | -        | -    | -    | HG918112.1     |
| <i>DAU-6</i>   | -                                                              | -         | -        | -        | -         | -         | -     | -     | -         | -        | -       | -         | -       | -     | -         | A         | -     | -        | -    | -    | n.a.           |
| <i>DAU-7</i>   | -                                                              | -         | -        | -        | -         | -         | -     | -     | -         | -        | -       | -         | -       | -     | A         | A         | -     | -        | -    | -    | n.a.           |
| <i>DAU-8</i>   | -                                                              | -         | -        | -        | -         | -         | T     | -     | -         | A        | -       | -         | -       | -     | -         | -         | -     | -        | -    | -    | n.a.           |
| <i>DAU-9</i>   | -                                                              | -         | -        | -        | -         | -         | -     | C     | -         | -        | -       | -         | -       | -     | -         | -         | -     | -        | -    | -    | n.a.           |
| <i>DAU10</i>   | -                                                              | -         | -        | -        | -         | -         | -     | -     | -         | A        | -       | -         | -       | C     | -         | -         | -     | -        | -    | -    | n.a.           |
| <i>DAU-11</i>  | -                                                              | -         | -        | -        | -         | T         | -     | -     | -         | -        | -       | -         | -       | -     | A         | -         | -     | -        | -    | -    | KU248927.1‡    |
| <i>DAU-12</i>  | -                                                              | -         | -        | -        | -         | -         | -     | -     | C         | -        | -       | -         | -       | -     | -         | -         | -     | -        | -    | -    | JX193761.1     |
| <i>DAU-13</i>  | C                                                              | -         | -        | -        | -         | -         | -     | -     | -         | -        | -       | -         | -       | -     | -         | -         | -     | -        | -    | -    | HG423861.1     |
| <i>DAU-14</i>  | -                                                              | -         | A        | A        | -         | -         | -     | -     | -         | -        | -       | -         | -       | -     | -         | -         | -     | -        | -    | -    | KF861938.1     |
| rs number†     | 772865539                                                      | rs1132758 | 41302032 | 62621068 | 142925159 | 139501061 | novel | novel | 149700508 | 77813628 | 1053356 | 374920252 | 1053359 | novel | 139704879 | 144996388 | novel | 61740966 | n.a. | n.a. |                |

\* The *RHD* mRNA RefSeqGene (GenBank accession number NM\_016124.4) was used as the reference sequence. All variations are described according to current mutation nomenclature guidelines,<sup>26</sup> ascribing the A of the first ATG translational initiation codon as nucleotide +1 in the mRNA's coding region. The numbers on the top refer to the nucleotide positions of the exon polymorphisms of the *RHD* gene. No polymorphisms have been observed in exons 9 and 10 in any of the *DAU* alleles.

† rs number — reference SNP number

‡ Three non-coding variations, -368A>G, IVS3+117T>C and IVS3+124G>A, have previously been observed by us in other *RHD* alleles (data not shown) such as weak D type 1 and weak D type 4.0 and hence did not represent a prevalent allele used for the *RHD* reference sequence (GenBank accession number NG\_007494.1).

n.a. — not applicable

**Table S5.** DAU variants and D antigen densities

| D variant | Molecular substitution                 |                                  | Phenotype | Ethnicity                       | Immunohematology  |                   |          |                    | Reference                  |
|-----------|----------------------------------------|----------------------------------|-----------|---------------------------------|-------------------|-------------------|----------|--------------------|----------------------------|
|           | Nucleotide                             | Amino acid                       |           |                                 | D antigen density | Anti-D reactivity |          | Anti-D in carriers |                            |
|           |                                        |                                  |           |                                 |                   | Weak              | Variable |                    |                            |
| DAU-0     | 1136C>T                                | T379M                            | ccDee     | European,<br>African            | 15,285            | No                | No       | n.r.               | 7,13                       |
| DAU-0.1   | 579G>A<br>1136C>T                      | E193E<br>T379M                   | ccDee     | African                         | n.r.              | n.r.              | n.r.     | n.r.               | 13                         |
| DAU-0.2   | 150T>C<br>1136C>T                      | V50V<br>T379M                    | n.r.      | n.r.                            | n.r.              | n.r.              | n.r.     | n.r.               | *                          |
| DAU-1     | 689G>T<br>1136C>T                      | S230I<br>T379M                   | ccDee     | African                         | 2,113             | Yes               | Yes      | n.r.               | 7                          |
| DAU-2     | 209G>A<br>998G>A<br>1136C>T            | R70Q<br>S333N<br>T379M           | ccDee     | African                         | 373               | Yes               | Yes      | n.r.               | 7                          |
| DAU-3     | 835G>A<br>1136C>T                      | V279M<br>T379M                   | ccDee     | African                         | 10,879            | n.r.              | n.r.     | Yes                | 7                          |
| DAU-4     | 697G>A<br>1136C>T                      | E233K<br>T379M                   | ccDee     | African                         | 1,909             | Yes               | Yes      | Yes                | 7,16                       |
| DAU-5     | 667T>G<br>697G>C<br>1136C>T            | F223V<br>E233Q<br>T379M          | ccDee     | European,<br>African            | 10,131            | No                | Yes      | n.r.               | 10,14,<br>Present<br>study |
| DAU-5.1   | 667T>G<br>697G>C<br>1122C>T<br>1136C>T | F223V<br>E233Q<br>I374I<br>T379M | ccDee     | African                         | 6236              | No                | Yes      | n.r.               | Present<br>study           |
| DAU-6     | 998G>A<br>1136C>T                      | S333N<br>T379M                   | ccDee     | African                         | n.r.              | n.r.              | n.r.     | n.r.               | 14                         |
| DAU-7     | 835G>A<br>998G>A<br>1136C>T            | V279M<br>S333N<br>T379M          | ccDee     | African                         | n.r.              | Yes               | n.r.     | n.r.               | 15                         |
| DAU-8     | 340C>T<br>579G>A<br>1136C>T            | R114W<br>E193E<br>T379M          | ccDee     | n.r.                            | n.r.              | n.r.              | n.r.     | n.r.               | 17                         |
| DAU-9     | 535T>C<br>1136C>T                      | F179L<br>T379M                   | ccDee     | n.r.                            | n.r.              | n.r.              | n.r.     | n.r.               | 17                         |
| DAU-10    | 579G>A<br>739G>C<br>1136C>T            | E193E<br>V247L<br>T379M          | ccDee     | n.r.                            | n.r.              | n.r.              | n.r.     | n.r.               | 17                         |
| DAU-11    | 254C>T<br>835G>A<br>1136C>T            | A85V<br>V279M<br>T379M           | ccDee     | African,<br>African<br>American | 2483              | Yes               | Yes      | n.r.               | Present<br>study           |
| DAU-12    | 542T>C<br>1136C>T                      | L181P<br>T379M                   | ccDee     | n.r.                            | n.r.              | n.r.              | n.r.     | n.r.               | JX193761.1                 |
| DAU-13    | 48G>C<br>1136C>T                       | W16C<br>T379M                    | ccDee     | African                         | n.r.              | n.r.              | n.r.     | n.r.               | HG423861.1                 |
| DAU-14    | 201G>A<br>203G>A<br>1136C>T            | S67S<br>S68N<br>T379M            | ccDee     | Arabian                         | n.r.              | No                | n.r.     | n.r.               | 18                         |

\* ISBT website (see Web resources)

n.r. — not reported

**Table S6.** The *RHCE* alleles associated with the 18 known *DAU* alleles

| <i>DAU</i> allele   | Associated <i>RHCE</i> allele    |                  |          |                         | Reference | Supporting observations |                      |                |
|---------------------|----------------------------------|------------------|----------|-------------------------|-----------|-------------------------|----------------------|----------------|
|                     | Allele                           | Trivial name     | Evidence | Other possible allele   |           | Observed at NIH (n)     | Observed at Linz (n) | GenBank number |
| <i>DAU-0</i>        | <i>RHCE*ce48C, 667T</i>          | <i>RHCE*ceMO</i> | CWD      | n.a.                    | 51        | n.a.                    | n.t.                 | n.a.           |
|                     | <i>RHCE*ce48C, 662G</i>          | n.a.             | CWD *    | n.a.                    | 52        | n.a.                    | n.t.                 | n.a.           |
|                     | <i>RHCE*ce48C</i>                | n.a.             | CWD      | <i>RHCE*ce</i>          | 53,54     | 1                       | n.t.                 | n.a.           |
|                     | <i>RHCE*ce254G</i>               | <i>RHCE*ceAG</i> | CWD      | <i>RHCE*ce</i>          | 53,54     | n.a.                    | n.t.                 | n.a.           |
|                     | <i>RHCE*733G*</i>                | n.a.             |          | <i>RHCE*ce</i>          | 53,54     | n.a.                    | n.t.                 | n.a.           |
|                     | <i>RHCE*ce48C,712G,787G,800A</i> | <i>RHCE*ceEK</i> | CWD *    | <i>RHCE*ce</i>          | n.a.      | 1                       | n.t.                 | KU556685       |
| <i>DAU-0.1</i>      | n.t.                             | n.a.             |          | n.a.                    | n.t.      | n.t.                    | n.a.                 |                |
| <i>DAU-0.2</i>      | n.t.                             | n.a.             |          | n.a.                    | n.t.      | n.t.                    | n.a.                 |                |
| <i>DAU-1</i>        | n.t.                             | n.a.             |          | n.a.                    | n.t.      | n.t.                    | n.a.                 |                |
| <i>DAU-2</i>        | n.t.                             | n.a.             |          | n.a.                    | n.t.      | n.t.                    | n.a.                 |                |
| <i>DAU-3</i>        | <i>RHCE*ce48C</i>                | n.a.             | CWD      | <i>RHCE*cE</i>          | 53,54     | 1                       | n.t.                 | n.a.           |
| <i>DAU-4</i>        | <i>RHCE*ce48C</i>                | n.a.             |          | n.a.                    | 53,54     | n.t.                    | n.t.                 | n.a.           |
| <i>DAU-5</i>        | <i>RHCE*ce48C</i>                | n.a.             | CWD      | <i>RHCE*ce48C, 254G</i> | 53,54     | 3                       | n.t.                 | n.a.           |
| <i>DAU-5.1</i>      | <i>RHCE*ce48C, 105T</i>          | n.a.             |          | <i>RHCE*ce</i>          | n.a.      | n.t.                    | 1                    | n.a.           |
| <i>DAU-6</i>        | n.t.                             | n.a.             |          | n.a.                    | n.t.      | n.t.                    | n.t.                 | n.a.           |
| <i>DAU-7</i>        | n.t.                             | n.a.             |          | n.a.                    | n.t.      | n.t.                    | n.t.                 | n.a.           |
| <i>DAU-8</i>        | n.t.                             | n.a.             |          | n.a.                    | n.t.      | n.t.                    | n.t.                 | n.a.           |
| <i>DAU-9</i>        | n.t.                             | n.a.             |          | n.a.                    | n.t.      | n.t.                    | n.t.                 | n.a.           |
| <i>DAU-10</i>       | n.t.                             | n.a.             |          | n.a.                    | n.t.      | n.t.                    | n.t.                 | n.a.           |
| <i>DAU-11</i> (NIH) | <i>RHCE*ce254G</i>               | <i>RHCE*ceAG</i> |          | <i>RHCE*733G †</i>      | n.a.      | 1                       | n.t.                 | n.a.           |
| <i>DAU-12</i>       | n.t.                             | n.a.             |          | n.a.                    | n.t.      | n.t.                    | n.t.                 | n.a.           |
| <i>DAU-13</i>       | n.t.                             | n.a.             |          | n.a.                    | n.t.      | n.t.                    | n.t.                 | n.a.           |
| <i>DAU-14</i>       | n.t.                             | n.a.             |          | n.a.                    | n.t.      | n.t.                    | n.t.                 | n.a.           |

\* 1 case observed, confirmed by family study

† Often linked to conventional *RHD*<sup>55</sup>

CWD — common and well-documented haplotype

n.a. — not applicable

n.t. — not tested

**Table S7.** The *RHCE* alleles associated with *DAU* alleles\*

| <i>RHCE</i> genotype               |                                   | <i>DAU</i> evidence (n) |                           |                   |       |
|------------------------------------|-----------------------------------|-------------------------|---------------------------|-------------------|-------|
| Allele 1                           | Allele 2                          | <i>DAU</i>              | <i>DAU</i> -0, -1, -2, -3 | <i>DAU</i> -4, -5 | Total |
| <i>RHCE</i> * <i>ce</i> 48C, 733G  | <i>RHCE</i> * <i>ce</i>           | 11                      | 1                         | 0                 | 12    |
| <i>RHCE</i> * <i>ce</i> 48C        | <i>RHCE</i> * <i>ce</i>           | 1                       | 4                         | 1                 | 6     |
| <i>RHCE</i> * <i>ce</i> 48C        | <i>RHCE</i> * <i>ce</i> 48C       | 2                       | 1                         | 1 †               | 4     |
| <i>RHCE</i> * <i>ce</i> 48C, 667T  | <i>RHCE</i> * <i>ce</i>           | 3                       | 0                         | 0                 | 3     |
| <i>RHCE</i> * <i>ce</i> 48C, 1025T | <i>RHCE</i> * <i>ce</i> 48C       | 0                       | 3                         | 0                 | 3     |
| <i>RHCE</i> * <i>ce</i> 48C, 667T  | <i>RHCE</i> * <i>Ce</i>           | 1                       | 2                         | 0                 | 3     |
| <i>RHCE</i> * <i>ce</i> 48C        | <i>RHCE</i> * <i>Ce</i>           | 0                       | 2                         | 0                 | 2     |
| <i>RHCE</i> * <i>ce</i> 733G       | <i>RHCE</i> * <i>ce</i>           | 2                       | 0                         | 0                 | 2     |
| <i>RHCE</i> * <i>ce</i> 254G       | <i>RHCE</i> * <i>ce</i>           | 1                       | 1                         | 0                 | 2     |
| <i>RHCE</i> * <i>ce</i> 48C, 733G  | <i>RHCE</i> * <i>ce</i> 48C       | 1                       | 1                         | 0                 | 2     |
| <i>RHCE</i> * <i>ce</i>            | <i>RHCE</i> * <i>ce</i>           | 0                       | 1                         | 0                 | 1     |
| <i>RHCE</i> * <i>ce</i> 254G       | <i>RHCE</i> * <i>ce</i> 48C       | 1 ‡                     | 0                         | 0                 | 1     |
| <i>RHCE</i> * <i>ce</i> 48C, 667T  | <i>RHCE</i> * <i>ce</i> 48C       | 0                       | 1                         | 0                 | 1     |
| <i>RHCE</i> * <i>ce</i> 254G       | <i>RHCE</i> * <i>ce</i> 48C       | 1                       | 0                         | 0                 | 1     |
| <i>RHCE</i> * <i>ce</i> 48C, 667T  | <i>RHCE</i> * <i>ce</i> 48C       | 1                       | 0                         | 0                 | 1     |
| <i>RHCE</i> * <i>ce</i> 1025T      | <i>RHCE</i> * <i>ce</i> 733G      | 0                       | 1                         | 0                 | 1     |
| <i>RHCE</i> * <i>ce</i> 48C, 1025T | <i>RHCE</i> * <i>ce</i> 254G      | 0                       | 1                         | 0                 | 1     |
| <i>RHCE</i> * <i>ce</i> 254G       | <i>RHCE</i> * <i>ce</i> 48C, 667T | 1                       | 0                         | 0                 | 1     |
| <i>RHCE</i> * <i>ce</i> 254G       | <i>RHCE</i> * <i>ce</i> S         | 1                       | 0                         | 0                 | 1     |
| <i>RHCE</i> * <i>ce</i> 48C, 733G  | <i>RHCE</i> * <i>ce</i> S         | 1                       | 0                         | 0                 | 1     |
| <i>RHCE</i> * <i>ce</i> 48C        | <i>RHCE</i> * <i>ce</i> E         | 1                       | 0                         | 0                 | 1     |
| <i>RHCE</i> * <i>ce</i> 48C, 667T  | <i>RHCE</i> * <i>ce</i> E         | 0                       | 1                         | 0                 | 1     |
| <i>RHCE</i> * <i>ce</i> 48C, 667T  | <i>RHCE</i> * <i>CE</i>           | 1                       | 0                         | 0                 | 1     |

\* Observations at BloodCenter of Wisconsin, where further molecular differentiation of “*DAU*-0, -1, -2, -3” and “*DAU*-4, -5” was not performed at this time.

† *DAU*-0/*DAU*-5

‡ *DAU*/weak *D* type 4.2

**Table S8.** DAU mutations and predicted effect on protein structure

| DAU mutation         |                     |                          | C-alpha atom distance from central pore (Å) | Bioinformatics program and computational analysis results |       |          |       |             | Prediction ** |
|----------------------|---------------------|--------------------------|---------------------------------------------|-----------------------------------------------------------|-------|----------|-------|-------------|---------------|
| Nucleotide position* | dbSNP reference no. | Amino acid substitution* |                                             | PolyPhen-2 †                                              | SIFT‡ | PROVEAN§ | SNAP2 | INPS (DDG)¶ |               |
| 48G>C                | rs772865539         | Trp16Cys                 | 25.559                                      | 0.000                                                     | 0.16  | -2.476   | -75   | -0.738      | Neutral       |
| 203G>A               | rs62621068          | Ser68Asn                 | 6.782                                       | 0.012                                                     | 0.19  | -1.098   | -79   | -0.069      | Neutral       |
| 209G>A               | rs142925159         | Arg70Gln                 | 9.384                                       | 0.747                                                     | 0.37  | -2.292   | -26   | -0.529      | Neutral       |
| 254C>T               | rs139501061         | Ala85Val                 | 15.95                                       | 0.584                                                     | 0.05  | -2.483   | -51   | -0.057      | Neutral       |
| 340C>T               | n.a.                | Arg114Trp                | 6.827                                       | 0.999                                                     | 0.07  | -2.610   | 37    | 0.028       | Deleterious   |
| 535T>C               | n.a.                | Phe179Leu                | 12.858                                      | 1.000                                                     | 0.05  | -5.335   | 70    | -1.323      | Deleterious   |
| 542T>C               | rs149700508         | Leu181Pro                | 12.285                                      | 0.997                                                     | 0.05  | -5.647   | 83    | -3.142      | Deleterious   |
| 667T>G               | rs1053356           | Phe223Val                | 6.145                                       | 0.025                                                     | 0.10  | -5.062   | 93    | -2.614      | Neutral       |
| 689G>T               | rs374920252         | Ser230Ile                | 9.753                                       | 0.005                                                     | 0.19  | -1.117   | -69   | -0.502      | Neutral       |
| 697G>A               | rs1053359           | Glu233Gln                | 12.654                                      | 0.062                                                     | 0.47  | -1.678   | 53    | -0.153      | Neutral       |
| 739G>C               | n.a.                | Val247Leu                | 18.408                                      | 0.990                                                     | 0.05  | -2.384   | 19    | -0.376      | Deleterious   |
| 835G>A               | rs139704879         | Val279Met                | 7.398                                       | 1.000                                                     | 0.01  | -2.749   | 61    | -1.749      | Deleterious   |
| 998G>A               | rs144996388         | Ser333Asn                | 9.508                                       | 0.254                                                     | 0.00  | -0.349   | -4    | -0.303      | Neutral       |
| 1136C>T              | rs61740966          | Thr379Met                | 20.602                                      | 0.162                                                     | 0.34  | -0.162   | -52   | 0.532       | Neutral       |

\* relative to NCBI Reference Sequence NM\_016124.4 and NP\_057208.2

† score 0.000–0.452 = benign, 0.453–0.956 = possibly damaging, 0.957–1.000 = probably damaging

‡ score ≤0.05 = damaging, >0.05 = tolerated; MIC = median sequence information (range 0 to 4.32)

§ score >-2.5 = neutral, ≤-2.5 = deleterious

|| score <0 = no effect, >0 = effect, >50 = strong signal for effect

¶ DDG ≥ -0.5 and ≤ 0.5 = neutral; DDG ≥ -1.0 and < -0.5 = slightly destabilizing; DDG ≤ 1.0 and > 0.5 = slightly stabilizing; DDG ≥ -2.0 and < -1.0 = destabilizing; DDG ≤ 2.0 and > 1.0 = stabilizing; DDG < -2.0 = highly destabilizing; DDG > 2.0 = highly stabilizing

\*\* To qualify as deleterious, the mutation had to be predicted as damaging by at least 3 of the 5 bioinformatics programs used.

n.a. not available



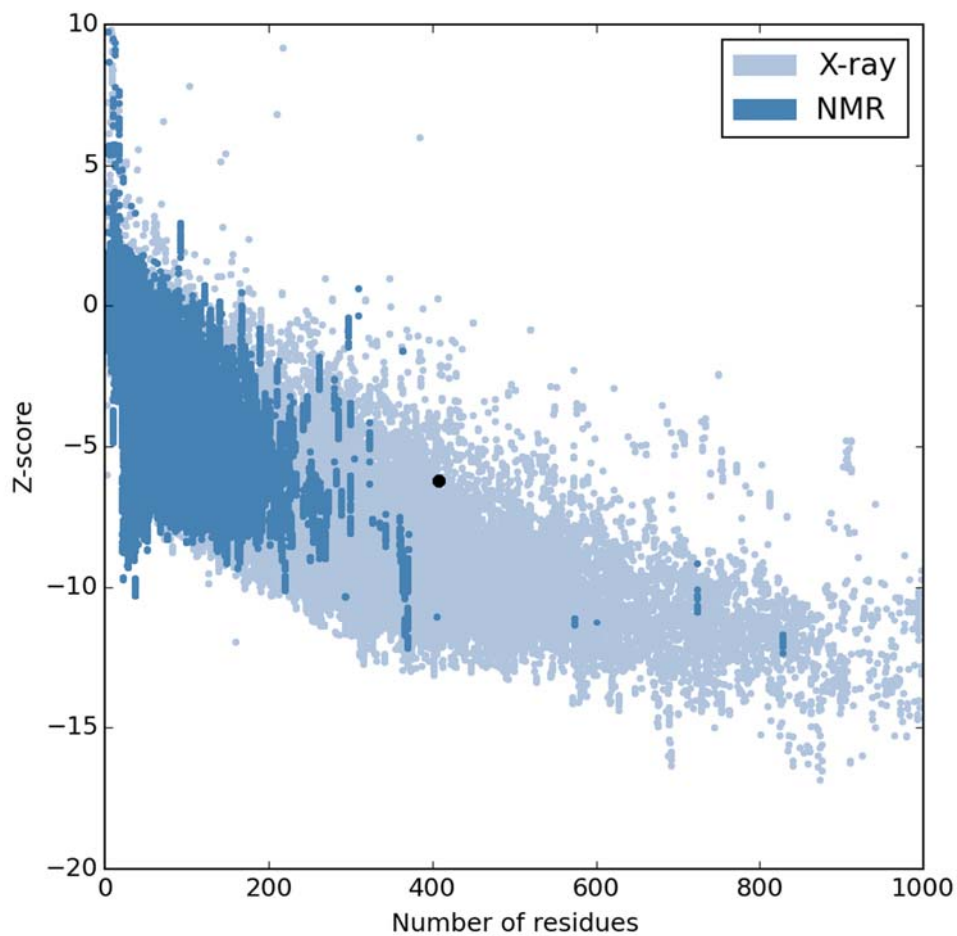**Figure S1**

**Fig. S1. ProSA-web z-score of RhD protein model.** ProSA-web z-score of all protein chains in PDB are shown (dots) as determined by X-ray crystallography (light blue dots) or NMR-spectroscopy (dark blue dots) with respect to their length (number of residues). The z-score of RhD protein model is highlighted (black dot).

ATG AGC TCT AAG TAC CCG CCG TCT GTC CCG CCG TGC CTG CCC CTC TG<sup>G</sup> GCC CTA ACA CTG GAA GCA 66  
 GCT CTC ATT CTC CTC TTC TAT TTT TTT ACC CAC TAT GA<sup>C</sup> GCT TCC TTA GAG GAT CAA AAG GGG CT<sup>C</sup> 132  
 G<sup>T</sup> TG GCA TCC TAT CAA G<sup>gt..ag</sup> TT<sup>T</sup> GGC CAA GAT CTG AC<sup>C</sup> G<sup>T</sup> TG ATG G<sup>CG</sup> GCC ATT GGC TTG GGC TTC CTC 195  
 ACC T<sup>CG</sup> A<sup>G</sup> T<sup>T</sup> C<sup>CG</sup> AGA CAC AGC TGG AGC AGT GTG GCC TTC AAC CTC TTC ATG CTG G<sup>CG</sup> CTT GGT 261  
 GTG CAG TGG GCA ATC CTG CTG GA<sup>C</sup> G<sup>T</sup> GC TTC CTG AGC CAG TTC CCT TCT GGG AAG GTG GTC ATC ACA 327  
 CTG TTC A<sup>G</sup> G<sup>gt..ag</sup> T ATT C<sup>CG</sup> G CTG GCC ACC ATG AGT GCT TTG T<sup>CG</sup> GTG CTG ATC TCA GTG GAT GCT GTC 390  
 TTG GGG AAG GTC AAC TTG G<sup>CG</sup> CAG TTG GTG GTG ATG GTG CTG GTG GAG GTG ACA GCT TTA GGC AAC 456  
 CTG AGG ATG GTC ATC AGT AAT ATC TTC AA<sup>C</sup> G<sup>gt..ag</sup> ACA GAC TAC CAC ATG AAC ATG ATG CAC ATC TA<sup>C</sup> 519  
 G<sup>T</sup> TG TT<sup>C</sup> G<sup>A</sup> GCC TAT TTT GGG CT<sup>T</sup> TCT GTG GCC TGG TGC CTG CCA AAG CCT CTA CC<sup>C</sup> G<sup>A</sup> GGA A<sup>CG</sup> 585  
 GAG GAT AAA GAT CAG ACA GCA A<sup>CG</sup> ATA CCC AGT TTG TCT GCC ATG CTG G<sup>gt..ag</sup> C<sup>C</sup> G<sup>T</sup> CC CTC TTC TTG 648  
 TGG ATG TTC TGG CCA AGT T<sup>T</sup> C AAC TCT GCT CTG CTG AGA A<sup>G</sup> T CCA AT<sup>C</sup> G<sup>A</sup> AAG AAG AAT G<sup>C</sup> G<sup>T</sup> 714  
 TTC AAC ACC TAC TAT GCT GTA GCA G<sup>T</sup> C AG<sup>C</sup> G<sup>T</sup> GTG ACA GCC ATC TCA GGG TCA TCC TTG GCT CAC 780  
 CCC CAA GGG AAG ATC AGC AAG G<sup>gt..ag</sup> ACT TAT GTG CAC AGT G<sup>CG</sup> GTG TTG GCA GGA G<sup>C</sup> G<sup>T</sup> GCT GTG 843  
 GGT ACC T<sup>CG</sup> TGT CAC CTG ATC CCT TCT C<sup>CG</sup> TGG CTT GCC ATG GTG CTG GGT CTT GTG GCT GGG CTG 909  
 ATC TC<sup>C</sup> G<sup>T</sup> C<sup>C</sup> GGG GGA GCC AAG TAC CTG C<sup>CG</sup> G<sup>gt..ag</sup> GGG TGT TGT AAC C<sup>GA</sup> GTG CTG GGG ATT CCC CAC 972  
 AGC TCC ATC ATG GGC TAC AAC TTC A<sup>G</sup> C TTG CTG GGT CTG CTT GGA GAG ATC ATC TAC ATT GTG CTG 1038  
 CTG GTG CTT GAT AC<sup>C</sup> G<sup>T</sup> C<sup>C</sup> G<sup>A</sup> G<sup>C</sup> G<sup>T</sup> GC AAT GGC AT<sup>gt..ag</sup> G ATT GGC TTC CAG GTC CTC CTC AGC ATT 1101  
 GGG GAA CTC AGC TTG GCC AT<sup>C</sup> G<sup>T</sup> G ATA GCT CTC A<sup>CG</sup> TCT GGT CTC CTG ACA G<sup>gt..ag</sup> GT TTG CTC CTA 1164  
 AAT CTT AAA ATA TGG AAA GCA CCT CAT GAG GCT AAA TAT TTT GAT GAC CAA GTT TTC TGG AAG G<sup>gt..ag</sup> 1227  
 TTT CCT CAT TTG GCT GTT GGA TTT TAA 1254

Figure S2

**Fig. S2. Distribution of CpG dinucleotides in the *RHD* coding sequence (CDS).** The nucleotides of the 10 exons (alternately black and blue) and the splice site nucleotides of the introns (green) are listed. The RhD CDS has 38 CpG sites (boxes). There are 18 nucleotide positions mutated in *DAU* alleles (yellow).
